# Supplementary material for: Acupuncture for Infantile Colic: A Systematic Review of Randomised Controlled Trials
Source: Hindawi journal article supplement (doi:10.1155/2018/7526234), 2018-01-01
Supplement: f1 [file 7526234.f1.pdf]

## Appendix 1. Searching strategy

### Medline-PubMed

- #1. acupuncture
- #2. acupressure
- #3. acupoint
- #4. #1 OR #2 OR #3
- #5. electro-acupuncture
- #6. meridian
- #7. electroacupuncture
- #8. moxibust
- #9. traditional chinese medicine
- #10. traditional oriental medicine
- #11. ACUPUNCTURE THERAPY
- #12. ACUPUNCTURE[MeSH Terms]
- #13. #5 OR #6 OR #7 OR #8 OR #9 OR #10 OR #11 OR #12
- #14. #4 OR #13
- #15. stomach
- #16. abdominal
- #17. abdomen
- #18. spasm
- #19. pain
- #20. cramp
- #21. #15 OR #16 OR #17 OR #18 OR #19 OR #20
- #22. colic[Title/Abstract]
- #23. colic[MeSH Terms])
- #24. #21 OR #22 OR #23
- #25. crying[Title/Abstract]
- #26. cry[Title/Abstract]
- #27. cries[Title/Abstract]
- #28. #25 OR #26 OR #27
- #29. infants
- #30. newborn
- #31. Baby
- #32. babies
- #33. children
- #34. #29 OR # 30 OR #31 OR #32 OR #33
- #35. #28 AND #34
- #36. #21 AND #35
- #37. #14 AND #36

## **CNKI and Wanfang**

#1. 针

#2. 针灸

#3. 耳针

#4. 耳针

#5. 电针

#6. 激光针

#7. #1 OR #2 OR #3 OR #4 OR #5 OR #6

#8. 腹痛

#9. 疝气

#10. 疝痛

#11. 夜啼

#12. #8 OR #9 OR #10 OR #11

#13. 小儿

#14. 婴儿

#15. #13 OR #14

#16. #7 AND #12 AND #15

**OASIS, Google Scholar and Cochrane Library**

#1. acupuncture

#2. acupuncture

#3. infantile

#4. #1 AND #2 AND #3
